1  
2  
3  
4  
5  
6  
7  
8  
9  
10  
11  
12  
13  
14  
15  
16  
17  
18  
19  
20  
21  
22  
23  
24  
25  
26  
27  
28  
29

**The Gram-positive model organism *Bacillus subtilis* does not form  
detectable cardiolipin-specific lipid domains**

Authors: Alex-Rose Pogmore, Kenneth H. Seistrup, and Henrik Strahl

Author affiliation: Centre for Bacterial Cell Biology, Institute for Cell and Molecular Biosciences,  
Newcastle University, Newcastle upon Tyne, United Kingdom

Correspondence: Henrik Strahl, email: [h.strahl@ncl.ac.uk](mailto:h.strahl@ncl.ac.uk), tel: +44 (0) 191 208 3240

Keywords: Lipid domains, Phospholipids, Cardiolipin, Polar localisation, *Bacillus subtilis*

Abbreviations: NAO, 10-nonylacridine orange bromide; Nile Red, 9-diethylamino-5-benzo[ $\alpha$ ]phenoxazinone.

30 ABSTRACT

31 Rather than being a homogenous diffusion-dominated structure, biological membranes can exhibit areas  
32 with distinct composition and characteristics commonly termed as lipid domains. Arguably the most  
33 comprehensively studied examples in bacteria are domains formed by cardiolipin, which have been  
34 functionally linked to polar protein targeting, cell division process, and mode of action of membrane  
35 targeting antimicrobials. Cardiolipin domains were originally identified in the Gram-negative model  
36 organism *Escherichia coli* based on preferential staining by the fluorescent membrane dye nonyl  
37 acridine orange (NAO), and later reported to exist also in other Gram-negative and -positive bacteria.  
38 Recently, the lipid-specificity of NAO has been questioned based on studies conducted in *E. coli*. This  
39 prompted us to re-analyse cardiolipin domains also in the Gram-positive model organism *B. subtilis*.  
40 Here we show that logarithmically growing *B. subtilis* does not form detectable cardiolipin-specific  
41 lipid domains, and that NAO is not a specific stain for cardiolipin in this organism.

42 FULL-TEXT

43 Our understanding of the structure and organisation of biological membranes is based on the classical  
44 fluid mosaic model of Singer and Nicolson, which describes biological membranes as a homogeneous  
45 two-dimensional fluid dominated by free lateral diffusion of lipids and embedded proteins [1].  
46 However, last decades of research have revealed that biological membranes are far more complex and  
47 heterogeneous than originally assumed, and specific lipid species can form distinct domains within  
48 biological membranes that fulfil specific biological functions [2, 3]. Arguably the most  
49 comprehensively studied type of bacterial lipid domain are clusters of cardiolipin forming at bacterial  
50 cell poles and cell division sites [4]. Cardiolipin is a complex phospholipid species commonly found in  
51 bacterial membranes, which is formed by two phosphatidylglycerol lipids linked together by an  
52 additional glycerol via phosphodiester bonds. Consequently, cardiolipin carries a double negative  
53 charge, a total of four fatty acid chains, and has an atypical conical molecular shape [5]. What makes  
54 cardiolipin unique in the context of lipid domain studies is the existence a cardiolipin-specific  
55 fluorescent membrane dye nonyl acridine orange (NAO) that allows the localisation and clustering-  
56 behaviour of cardiolipin to be analysed in living bacterial cells [4, 6]. Due to its positive charge, NAO  
57 preferentially stains membranes containing anionic phospholipids. Upon interaction with cardiolipin,  
58 NAO undergoes a redshift in the fluorescent emission spectrum, thereby allowing the microscopic  
59 identification and visualisation of membrane areas that are enriched in cardiolipin [4, 6].

60 By using NAO-staining, Mileykovskaya and co-workers showed in their seminal study that *E.*  
61 *coli* membranes contain specific cardiolipin-enriched lipid domains that are localised at the cell poles  
62 and cell division sites [6]. Importantly, these findings were independently confirmed by analysing the  
63 composition of so-called minicells. These small cells are formed by a misplaced cell division occurring  
64 at the cell pole, which results in small anucleate cells that are highly enriched in cell material normally  
65 found at the cell poles. The analysis of the lipid composition of minicells revealed a clear enrichment  
66 of cardiolipin, thereby providing strong support for the polar cardiolipin domain hypothesis [7]. The  
67 mechanism through which cardiolipin accumulates at the cell poles is linked to the atypical conical  
68 shape of the cardiolipin molecule, which provides preference to curved membrane found at the cell  
69 poles [8-10]. By forming a polar landmark that allows cardiolipin-interacting proteins to be specifically

70 targeted to bacterial cell poles, cardiolipin domains have been suggested to be functionally linked to  
71 several prominent cellular processes such as cell division, chemotaxis, and transport [11-15]. At last,  
72 due to the high negative surface charge, polar cardiolipin domains have been discussed as preferred  
73 targets for cationic membrane targeting antimicrobials such as host immunity peptides [16-19].

74         Recently, however, the strict specificity of NAO towards cardiolipin has been questioned [20].  
75 By carefully analysing the staining-specificity both *in vitro* and *in vivo*, Oliver and co-workers  
76 concluded that the characteristic red-shifted fluorescence emission of NAO is not specific for dye  
77 molecules interacting with cardiolipin but rather promiscuous for anionic phospholipids in general.  
78 These studies were conducted in the Gram-negative model organism *E. coli* and much less attention has  
79 been given to other bacteria with respect to rigorous testing the specificity of NAO-staining. Instead,  
80 the broad conservation of cardiolipin-specific domains among bacterial species has been largely  
81 accepted within the community. Due to the concerns emerging from the *E. coli* studies, we decided to  
82 reanalyse both the existence of cardiolipin-domains, and the staining-specificity of NAO in the Gram-  
83 positive model organism *B. subtilis*.

84         To our surprise, when we stained *B. subtilis* wild type cells grown in LB medium with low  
85 concentrations of NAO (100 nM), we did not observe the previously reported lipid domains (Fig. 1a).  
86 Instead, the NOA membrane stain was perfectly smooth both in the green wavelength range (500-550  
87 nm), and in the potentially cardiolipin-specific red wavelength range (593-667 nm). In both cases, the  
88 fluorophore was excited with 450-490 nm light. The only detectable local enrichment in fluorescent  
89 NAO-signal was the enhanced fluorescence emitted by the septum; a phenomenon originating from  
90 close proximity of two parallel membranes present at septum, which results in an increased septal signal  
91 of any disperse membrane-associated fluorophore. The same absence of detectable lipid domains was  
92 observed in DSM medium, which was the medium used in the original publication describing  
93 cardiolipin domains in *B. subtilis* (Fig. 1a) [21]. In our laboratory, the standard technique to stain cells  
94 with membrane dyes is to withdraw a 100-200 µl aliquot of an actively growing culture, and to stain  
95 the cell suspension in a round bottom 2 ml Eppendorf tube with a perforated lid at the growth  
96 temperature, and upon constant shaking. This is to ensure continuous aeration of the culture, which is  
97 crucial to maintain the cells adequately energised [22, 23], and to minimise changes in temperature,

98 which can directly influence the analysed membranes by altering membrane fluidity and by triggering  
99 adaptation of the lipid composition [24, 25]. While the exact staining conditions are not  
100 comprehensively described in the original publication, the authors do mention that the staining was  
101 carried out for 20 min at room temperature [21]. To test if different staining temperatures could explain  
102 the discrepancy, we repeated the experiments with staining taking place at 20°C, as opposed to  
103 incubation at the growth temperature of 37°C. Indeed, under these conditions we could reproduce the  
104 previously published staining pattern with distinct domains present in the cytoplasmic membranes  
105 (Figs. 1b and S1). However, a frequent domain formation was only observed in cells grown in the DSM  
106 medium. A large majority of cells grown in LB medium were free of NAO-stained lipid domains even  
107 upon staining at 20°C (Figs. 1b and S1). Consequently, we must conclude that actively growing *B.*  
108 *subtilis* cells do not form lipid domains than can be preferentially stained by NAO. Instead, the detected  
109 domains are a consequence of the staining procedure, and are limited to certain growth media.

110 Next, we analysed the cardiolipin-specificity of the staining pattern observed in DSM medium  
111 upon cold shock. For this aim, we used a strain that carries deletions of the three known cardiolipin  
112 synthase genes *clsA*, *clsB* and *ywiE*. To verify that our strain indeed does not synthesise cardiolipin, we  
113 compared the thin layer chromatography profiles of lipid extracts from both the wild type and the  
114 cardiolipin synthase-deficient strain. In brief, this analysis was carried out for cells grown in LB-  
115 medium at 37°C to an OD<sub>600</sub> of 1.0 by extraction of polar lipids from freeze-dried cell pellet using a  
116 modified Bligh and Dyer-solvent extraction protocol (initial extraction in chloroform:methanol:0.3%  
117 aqueous NaCl mixture of 1:2:0.8 (v/v/v), followed by transfer to the chloroform-phase by adjustment  
118 to a ratio of 1:1:0.9) [26]. The TLC analysis and the identification of individual phospholipid species  
119 were carried out as described in Tindall *et al.* (2007) [27]. The extraction and identification of the  
120 phospholipids was carried out by the Identification Service of the DSMZ, Braunschweig, Germany. As  
121 shown in Fig. 2a, the membranes of the tested cardiolipin synthase-deficient strain do not contain  
122 detectable levels of cardiolipin. Unexpectedly, the domain formation observed upon cold shock with  
123 NAO turned out to be indistinguishable between wild type cells and cardiolipin-deficient cells, thus  
124 arguing that the observed domains are not specific clusters of cardiolipin (Fig. 2a). The existence of  
125 NAO-stained polar lipid domains in the absence of cardiolipin have also been reported for *E. coli* [20].

126 In this case, the domain formation was shown to require the synthesis of another common anionic lipid  
127 species phosphatidylglycerol. Hence, clustering of other negatively charged phospholipids that  
128 accumulate at the cell poles in the absence of cardiolipin was put forward as an explanation for the  
129 observed domains [20]. In contrast to *E. coli*, phosphatidylglycerol is an essential phospholipid species  
130 in *B. subtilis*, and depletion of phosphatidylglycerol synthase PgsA results in a lethal loss of membrane  
131 integrity [28]. Therefore, we chose to test the anionic nature of the observed lipid domains with an  
132 alternative method, and repeated the membrane staining of the cardiolipin-deficient deletion mutant  
133 with an uncharged fluorescent membrane dye Nile Red [29, 30]. The cold shock-triggered lipid domain  
134 pattern was readily detectable also with Nile Red (Fig. 2b), thus ruling out a charge-driven mechanism  
135 for the preferential staining. While this experiment formally does not disprove the possibility that the  
136 observed domains are enriched in anionic phospholipids, negative charge appears not to be the defining  
137 feature of these domains. Thus, the cold-shock triggered domain formation in *B. subtilis* is most likely  
138 a phenomenon that is unrelated to the formation of polar anionic lipid domains in *E. coli*.

139 We have previously shown that dissipation of membrane potential results in delocalisation of  
140 bacterial actin homologs MreB, Mbl, and MreBH; a process that is linked to formation of fluid lipid  
141 domains that can be visualised with Nile Red [22, 28]. To test if the cold-shock induced lipid domains  
142 also depend on MreB-homologs, we repeated the membrane staining experiments in a strain that is  
143 deleted for *mreB*, *mbl*, and *mreBH*. However, these cells, which have lost their rod-shape due to the  
144 absence of MreB-dependent lateral cell wall synthesis [31], were still forming NAO and Nile Red  
145 stained lipid domains in a cold shock-dependent manner (Figs. 2b-c and S3). The mechanism that  
146 triggers the formation of the observed lipid domains upon cold shock, and the composition and  
147 physicochemical characteristic that define these domains remains elusive. More comprehensive future  
148 studies are needed to properly characterise this novel type of cold shock-triggered bacterial lipid  
149 domain. However, we must conclude that these lipid domains are not characterised by localised  
150 clustering of cardiolipin.

151 At last, throughout our experiments we did not observe a noticeable difference in the intensity  
152 of the fluorescence membrane staining between cells that synthesise cardiolipin and cells that do not.  
153 This was also true for the red wavelength range, which has been postulated to be specific for cardiolipin.

154 To quantify this, we measured the red fluorescence intensity profiles for 30 NAO-stained cells grown  
155 in LB medium for wild type (Fig. 2d) and for cardiolipin-deficient strain (Fig. 2e). These measurements  
156 clearly demonstrate that NAO-fluorescence is not a reliable reporter for cardiolipin in the Gram-positive  
157 model organism *B. subtilis*. In the wider context, these findings highlight that, rather than relying on  
158 data obtained from other species, the potential lipid-specificity of NAO must be verified for the used  
159 bacterial species on a case-by-case basis, by using appropriate lipid synthase deletion strains.

160 ACKNOWLEDGEMENT

161 We would like to acknowledge Kathi Scheinpflug for early microscopy experiments that led to this  
162 project.

163

164 FUNDING INFORMATION

165 Funding for this project was provided by Newcastle University.

166

167 CONFLICTS OF INTEREST

168 The authors declare that there are no conflicts of interest.



169 REFERENCES

- 170 1. **Singer SJ, Nicolson GL.** The fluid mosaic model of the structure of cell membranes. *Science*  
171 1972;175:720-731.
- 172 2. **Nicolson GL.** The fluid-mosaic model of membrane structure: still relevant to understanding  
173 the structure, function and dynamics of biological membranes after more than 40 years.  
174 *Biochim Biophys Acta* 2014;1838:1451-1466.
- 175 3. **Vereb G, Szollosi J, Matko J, Nagy P, Farkas T et al.** Dynamic, yet structured: The cell  
176 membrane three decades after the Singer-Nicolson model. *Proc Natl Acad Sci U S A*  
177 2003;100:8053-8058.
- 178 4. **Mileykovskaya E, Dowhan W.** Cardiolipin membrane domains in prokaryotes and eukaryotes.  
179 *Biochim Biophys Acta* 2009;1788:2084-2091.
- 180 5. **Huang KC, Ramamurthi KS.** Macromolecules that prefer their membranes curvy. *Mol*  
181 *Microbiol* 2010;76:822-832.
- 182 6. **Mileykovskaya E, Dowhan W.** Visualization of phospholipid domains in *Escherichia coli* by  
183 using the cardiolipin-specific fluorescent dye 10-N-nonyl acridine orange. *J Bacteriol*  
184 2000;182:1172-1175.
- 185 7. **Koppelman CM, Den Blaauwen T, Duursma MC, Heeren RM, Nanninga N.** *Escherichia*  
186 *coli* minicell membranes are enriched in cardiolipin. *J Bacteriol* 2001;183:6144-6147.
- 187 8. **Huang KC, Mukhopadhyay R, Wingreen NS.** A curvature-mediated mechanism for  
188 localization of lipids to bacterial poles. *PLoS Comp Biol* 2006;2:e151.
- 189 9. **Mukhopadhyay R, Huang KC, Wingreen NS.** Lipid localization in bacterial cells through  
190 curvature-mediated microphase separation. *Biophys J* 2008;95:1034-1049.
- 191 10. **Renner LD, Weibel DB.** Cardiolipin microdomains localize to negatively curved regions of  
192 *Escherichia coli* membranes. *Proc Natl Acad Sci U S A* 2011;108:6264-6269.
- 193 11. **Shiomi D, Yoshimoto M, Homma M, Kawagishi I.** Helical distribution of the bacterial  
194 chemoreceptor via colocalization with the Sec protein translocation machinery. *Mol Microbiol*  
195 2006;60:894-906.
- 196 12. **Romantsov T, Stalker L, Culham DE, Wood JM.** Cardiolipin controls the osmotic stress  
197 response and the subcellular location of transporter ProP in *Escherichia coli*. *J Biol Chem*  
198 2008;283:12314-12323.
- 199 13. **Matsumoto K, Kusaka J, Nishibori A, Hara H.** Lipid domains in bacterial membranes. *Mol*  
200 *Microbiol* 2006;61:1110-1117.
- 201 14. **Nishibori A, Kusaka J, Hara H, Umeda M, Matsumoto K.** Phosphatidylethanolamine  
202 domains and localization of phospholipid synthases in *Bacillus subtilis* membranes. *J Bacteriol*  
203 2005;187:2163-2174.
- 204 15. **Romantsov T, Battle AR, Hendel JL, Martinac B, Wood JM.** Protein localization in  
205 *Escherichia coli* cells: comparison of the cytoplasmic membrane proteins ProP, LacY, ProW,  
206 AqpZ, MscS, and MscL. *J Bacteriol* 2010;192:912-924.
- 207 16. **Tran TT, Panesso D, Mishra NN, Mileykovskaya E, Guan Z et al.** Daptomycin-resistant  
208 *Enterococcus faecalis* diverts the antibiotic molecule from the division septum and remodels  
209 cell membrane phospholipids. *MBio* 2013;4.
- 210 17. **Rashid R, Veleba M, Kline KA.** Focal targeting of the bacterial envelope by antimicrobial  
211 peptides. *Front Cell Dev Biol*, 2016;4.
- 212 18. **Epand RM, Epand RF.** Lipid domains in bacterial membranes and the action of antimicrobial  
213 agents. *Biochim Biophys Acta* 2009;1788:289-294.
- 214 19. **Malanovic N, Lohner K.** Antimicrobial peptides targeting Gram-positive bacteria.  
215 *Pharmaceuticals* 2016;9.
- 216 20. **Oliver PM, Crooks JA, Leidl M, Yoon EJ, Saghatelian A et al.** Localization of anionic  
217 phospholipids in *Escherichia coli* cells. *J Bacteriol* 2014;196:3386-3398.
- 218 21. **Kawai F, Shoda M, Harashima R, Sadaie Y, Hara H et al.** Cardiolipin domains in *Bacillus*  
219 *subtilis* Marburg membranes. *J Bacteriol* 2004;186:1475-1483.
- 220 22. **Strahl H, Hamoen LW.** Membrane potential is important for bacterial cell division. *Proc Natl*  
221 *Acad Sci U S A* 2010;107:12281-12286.

- 222 23. **Te Winkel JD, Gray DA, Seistrup KH, Hamoen LW, Strahl H.** Analysis of antimicrobial-  
223 triggered membrane depolarization using voltage sensitive dyes. *Front Cell Dev Biol*  
224 2016;4:29.
- 225 24. **Hazel JR.** Thermal adaptation in biological membranes - is homeoviscous adaptation the  
226 explanation. *Annu Rev Physiol* 1995;57:19-42.
- 227 25. **Parsons JB, Rock CO.** Bacterial lipids: metabolism and membrane homeostasis. *Prog Lipid*  
228 *Res* 2013;52:249-276.
- 229 26. **Bligh EG, Dyer WJ.** A rapid method of total lipid extraction and purification. *Can J Biochem*  
230 *Physiol* 1959;37(8):911-917.
- 231 27. **Tindall BJ, Sikorski J, Smibert RA, Krieg NR.** Phenotypic characterization and the  
232 principles of comparative systematics. In: Reddy C, Beveridge T, Breznak J, Marzluf G,  
233 Schmidt T, Snyder L (eds), *Methods for General and Molecular Microbiology*, 3rd edn.  
234 American Society of Microbiology; 2007, pp 330–393.
- 235 28. **Strahl H, Bürmann F, Hamoen LW.** The actin homologue MreB organizes the bacterial cell  
236 membrane. *Nat Commun* 2014;5.
- 237 29. **Greenspan P, Fowler SD.** Spectrofluorometric studies of the lipid probe, Nile red. *J Lipid Res*  
238 1985;26:781-789.
- 239 30. **Kucherak OA, Oncul S, Darwich Z, Yushchenko DA, Arntz Y et al.** Switchable Nile red-  
240 based probe for cholesterol and lipid order at the outer leaflet of biomembranes. *J Am Chem*  
241 *Soc* 2010;132:4907-4916.
- 242 31. **Schirner K, Errington J.** The cell wall regulator  $\sigma I$  specifically suppresses the lethal  
243 phenotype of *mbl* mutants in *Bacillus subtilis*. *J Bacteriol* 2009;191:1404-1413.
- 244 32. **Barbe V, Cruveiller S, Kunst F, Lenoble P, Meurice G et al.** From a consortium sequence  
245 to a unified sequence: the *Bacillus subtilis* 168 reference genome a decade later. *Microbiology*  
246 2009;155:1758-1775.
- 247 33. **Salzberg LI, Helmann JD.** Phenotypic and transcriptomic characterization of *Bacillus subtilis*  
248 mutants with grossly altered membrane composition. *J Bacteriol* 2008;190:7797-7807.

249 **Table 1: Strains used in this study**

| Strain                    | Relevant Genotype                                                                    | Source     | Construction                                                                                                                                     |
|---------------------------|--------------------------------------------------------------------------------------|------------|--------------------------------------------------------------------------------------------------------------------------------------------------|
| <i>B. subtilis</i> 168    | <i>trpC2</i> (wild type)                                                             | [32]       | -                                                                                                                                                |
| <i>B. subtilis</i> SDB206 | <i>clsA(ywnE)::ery clsB(ywjE)::spc</i><br><i>ywiE::neo</i>                           | [21]       | -                                                                                                                                                |
| <i>B. subtilis</i> HB5347 | <i>clsA(ywnE)::tet</i>                                                               | [33]       | -                                                                                                                                                |
| <i>B. subtilis</i> ARK3   | <i>clsA(ywnE)::tet clsB(ywjE)::spc</i><br><i>ywiE::neo</i>                           | this study | transformation of <i>clsA::tet</i> , <i>clsB::spc</i> , and <i>ywiE::neo</i> into <i>B. subtilis</i> 168                                         |
| <i>B. subtilis</i> 4277   | $\Omega$ neo3427 $\Delta$ <i>mreB</i> <i>mbl::cat</i><br><i>mreBH::erm rsgl::spc</i> | [31]       | -                                                                                                                                                |
| <i>B. subtilis</i> KS60   | $\Omega$ neo3427 $\Delta$ <i>mreB</i> <i>mbl::cat</i><br><i>mreBH::erm rsgl::spc</i> | this study | transformation of $\Omega$ neo3427 $\Delta$ <i>mreB</i> , <i>mbl::cat</i> , <i>mreBH::erm</i> , and <i>rsgl::spc</i> into <i>B. subtilis</i> 168 |

250

251 **Figure 1**

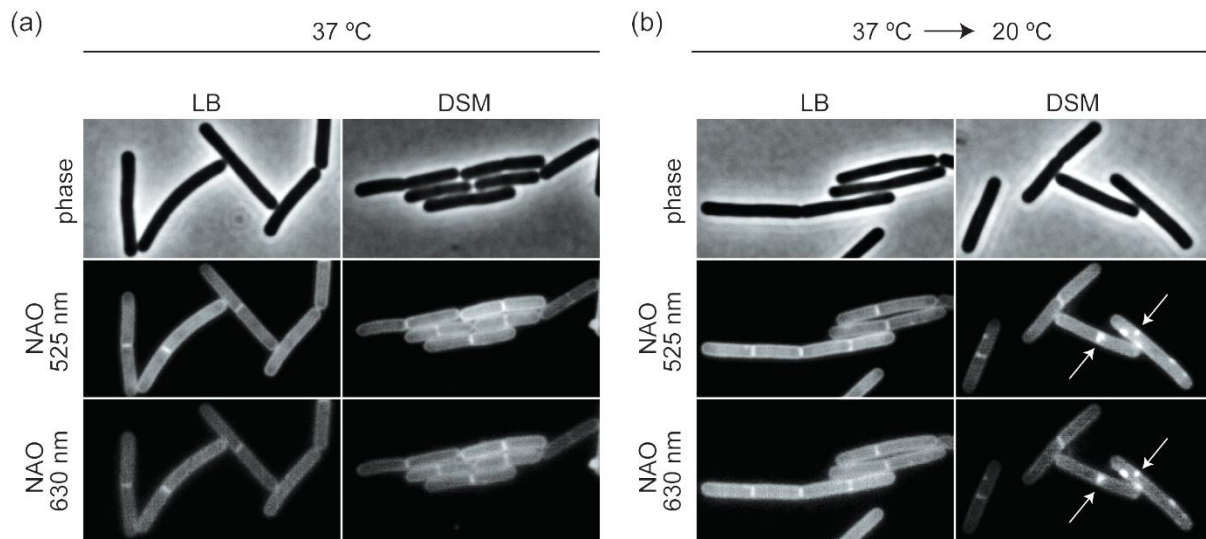

252

253 Fig. 1. (a) Phase-contrast images (upper panels), and NAO fluorescent membrane stains at 525 nm  
254 (middle panels) and at 630 nm (lower panels) of logarithmic growth phase *B. subtilis* cells grown in LB  
255 and DSM-media at 37°C, respectively. For these images the cells were stained for 20 min at 37 °C. (b)  
256 Comparable phase-contrast and fluorescent micrographs of *B. subtilis* cells grown at 37 °C, but stained  
257 with NAO for 20 min at 20°C. Few of the emerging domains are indicated with arrows. The final  
258 concentration of NAO upon staining was 100 nM. Strain used: *B. subtilis* 168 (wild type). See  
259 supplementary Fig. 1 for a larger field of view with more cells.

260 **Figure 2**

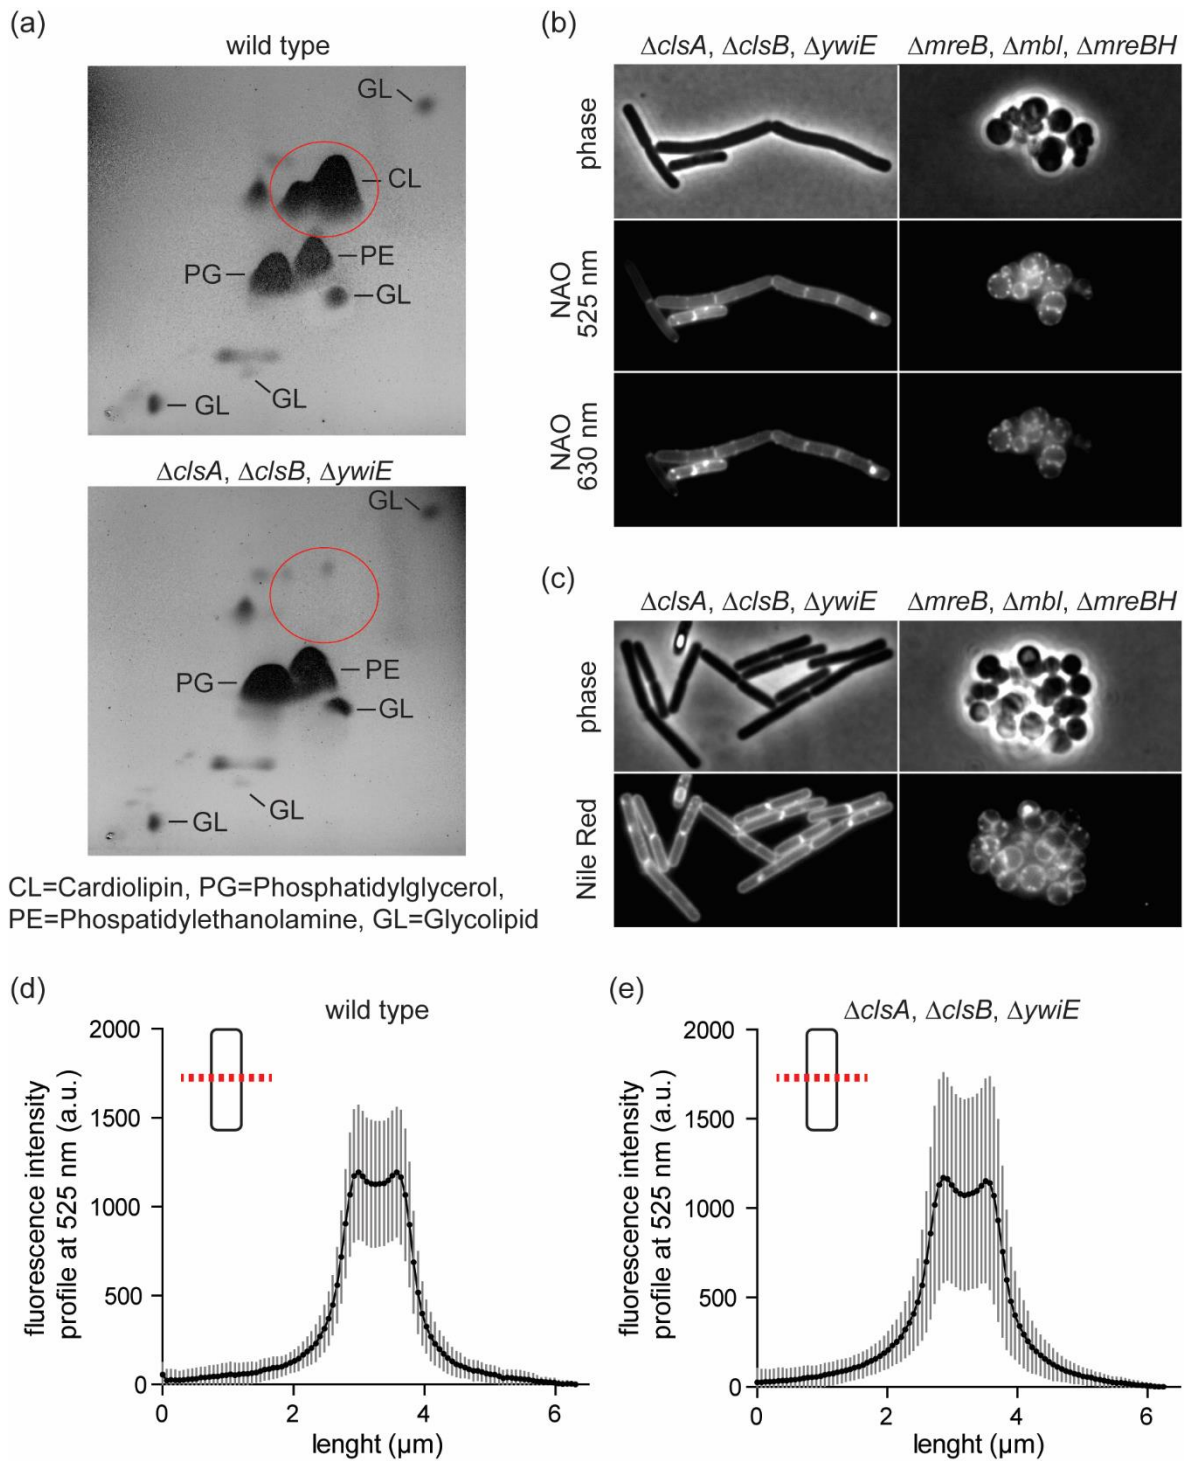

261

262 Fig. 2. (a) Thin layer chromatography showing the phospholipid profiles of *B. subtilis* wild type, and *B.*

263 *subtilis* strain deficient for cardiolipin synthase homologs. For the TLC-analysis, the cells were grown

264 in LB medium at 37 °C, and harvested at OD<sub>600</sub>=1.0. (b) Phase-contrast images (upper panels), and

265 NAO fluorescent membrane stains at 525 nm (middle panels) and at 630 nm (lower panels) of

266 logarithmic growth phase *B. subtilis* cells deficient for cardiolipin synthase homologs (left panels) and  
267 MreB homologs (right panels). The final concentration of NAO upon staining was 100 nM. (c) Phase-  
268 contrast images (upper panels), and Nile Red fluorescent membrane stains (lower panels) of logarithmic  
269 growth phase *B. subtilis* cells deficient for cardiolipin synthase homologs (left panels) and MreB  
270 homologs (right panels). The final concentration of Nile Red upon staining was 500 nM. The cells  
271 shown in panels (b) and (c) were grown in DSM medium at 37 °C, followed by staining for 20 min at  
272 20 °C. In case of Nile Red, the dye was added only for the last 5 min of the 20 °C incubation period.  
273 The *mreB*-triple deletion mutant was grown in DSM medium supplemented with 20 mM MgCl<sub>2</sub>, which  
274 is required for the growth of this strain. See Fig. S2 and S3 for comparable micrographs of cells stained  
275 at the growth temperature (37 °C). (d/e) NAO fluorescence intensity profiles measured perpendicular  
276 to the cell length axis for *B. subtilis* wildtype cells (d), and for cells deficient for cardiolipin synthase  
277 homologs (e). Both graphs depict the average and standard deviations of profiles from 30 individual  
278 cells. Strains used: *B. subtilis* 168 (wild type), *B. subtilis* ARK3 (deficient for cardiolipin), and *B.*  
279 *subtilis* KS60 (deficient for MreB-homologs).



280 **Supplementary Information**

281 **Figure S1**

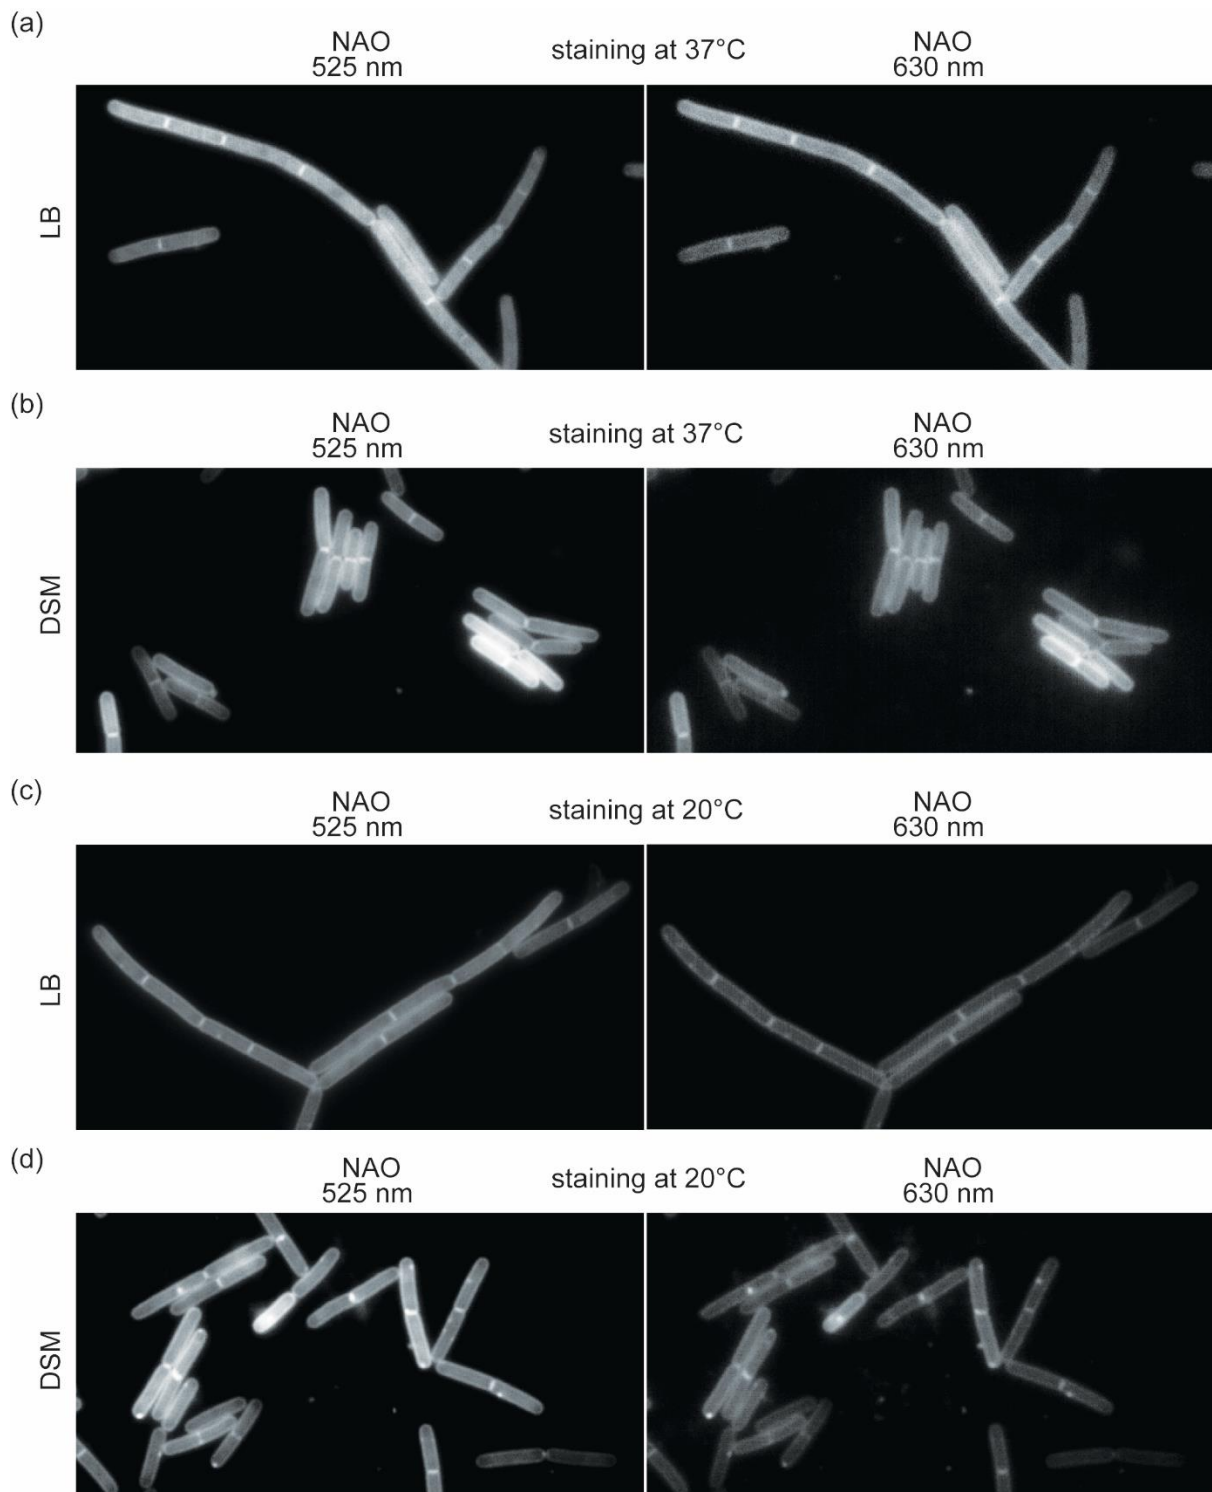

282

283 Fig. S1. NAO fluorescent membrane stains at 525 nm (left panels) and at 630 nm (right panels) of

284 logarithmic growth phase *B. subtilis* cells grown in LB (a) and DSM (b) media at 37°C, respectively.

285 For these images, the cells were stained for 20 min at 37 °C. Comparable fluorescent micrographs of  
286 logarithmic growth phase *B. subtilis* cells grown at 37 °C in LB (c) and DSM-media (d), but stained  
287 with NAO for 20 min at 20°C. Note that the visible domains are absent in all fields except those shown  
288 in panel d. Strain used: *B. subtilis* 168 wildtype. This is a larger field of view of cells shown in Fig. 1.  
289 Strain used: *B. subtilis* 168 (wildtype).



290 **Figure S2**

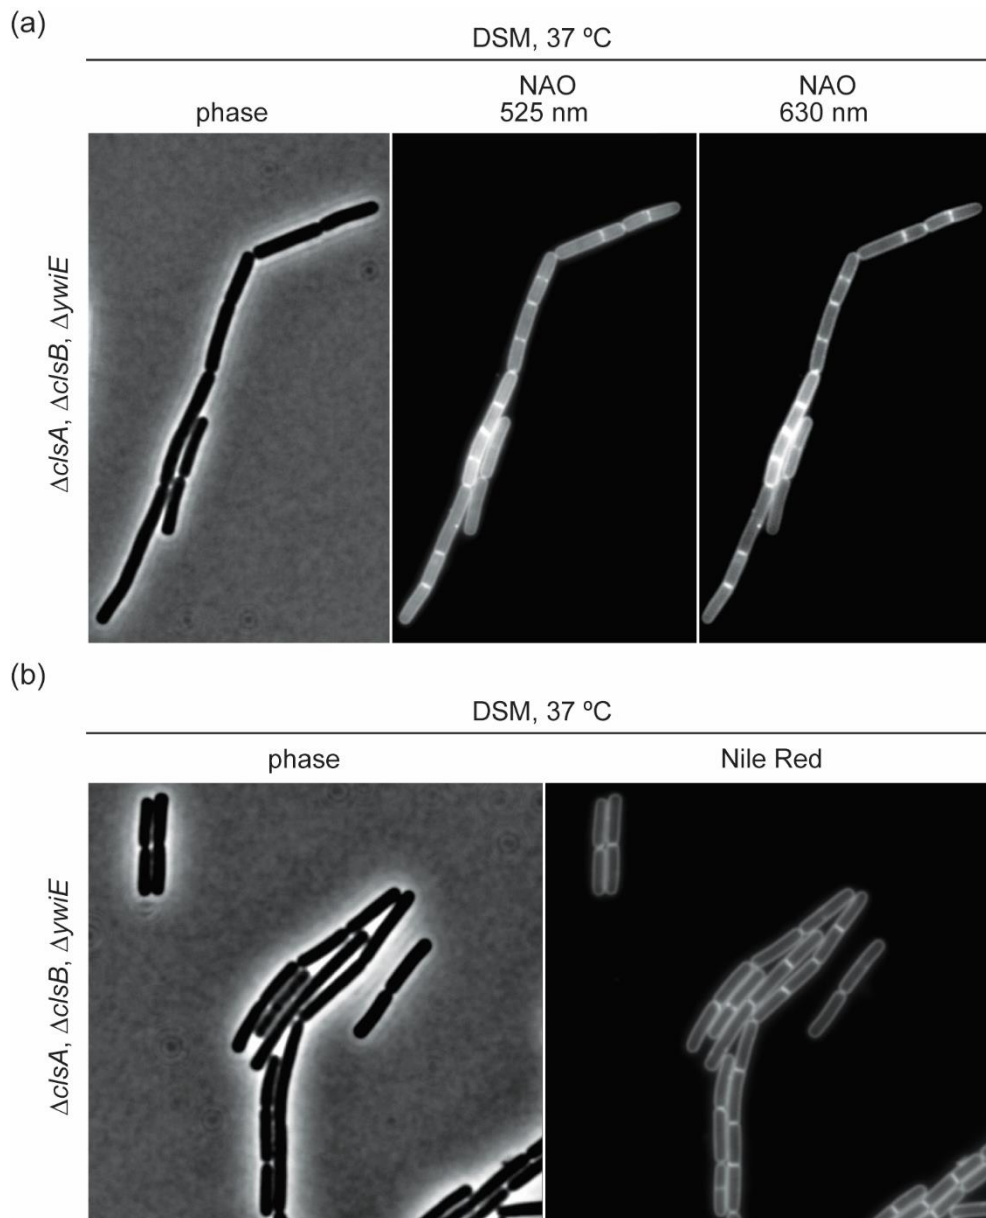

291

292 Fig. S2. (a) Phase-contrast images (left panel), and NAO fluorescent membrane stains at 525 nm  
293 (middle panel) and at 630 nm (right panels) of logarithmic growth phase *B. subtilis* cells deficient for  
294 cardiolipin synthases. (b) Phase-contrast images (left panel) and Nile Red fluorescent membrane stains  
295 (right panel) of logarithmic growth phase *B. subtilis* cells deficient for cardiolipin synthases. For these  
296 micrographs the cells were grown in DSM medium, and stained with NAO for 20 min at the growth  
297 temperature (37°C). Note that visible domains are absent in all shown fields. Strain used: *B. subtilis*  
298 ARK3 (deficient for cardiolipin).

299 **Figure S3**

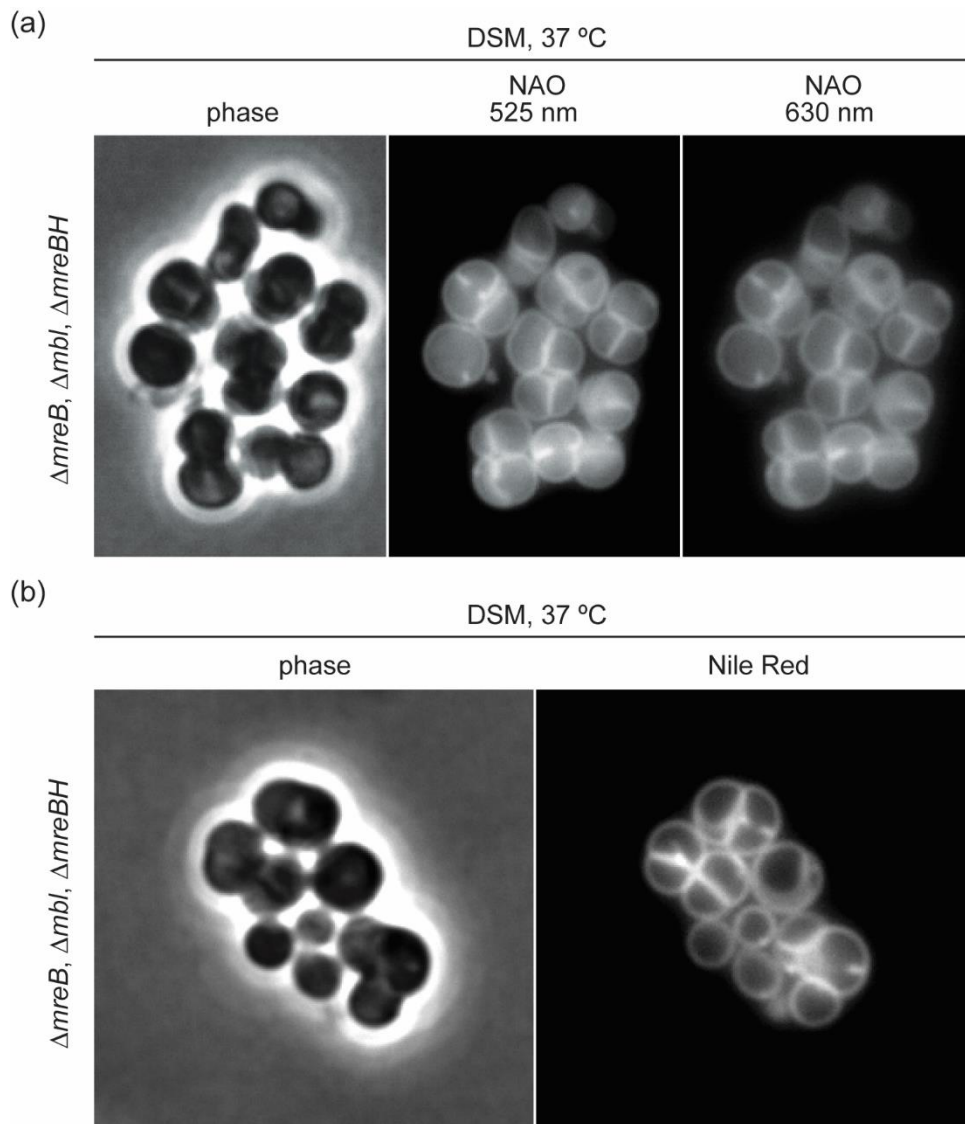

300

301 Fig. S3. (a) Phase-contrast images (left panel), and NAO fluorescent membrane stains at 525 nm  
302 (middle panel) and at 630 nm (right panels) of logarithmic growth phase *B. subtilis* cells deficient for  
303 MreB-homologs. (b) Phase-contrast images (left panel) and Nile Red fluorescent membrane stains  
304 (right panel) of logarithmic growth phase *B. subtilis* cells deficient for MreB-homologs. For these  
305 micrographs the cells were grown in DSM medium, and stained with NAO for 20 min at the growth  
306 temperature (37°C). Note that visible domains are absent in all shown fields. Strain used: *B. subtilis*  
307 KS60 (deficient for MreB-homologs).
